# Supplementary material for: Arecoline Induces ROS Accumulation, Transcription of Proinflammatory Factors, and Expression of KRT6 in Oral Epithelial Cells
Source: MDPI journal article supplement (doi:10.3390/biomedicines12020412), 2024-02-09
Supplement: s1 [file s1]

**Supplementary Materials:****Supplemental Table S1.** Information of Primary Antibodies for Western Blot Analysis.

| Target             | Catalog Number | Supplier       |
|--------------------|----------------|----------------|
| Catalase           | sc-271803      | Santa Cruz     |
| CDK1               | ab265590       | abcam          |
| Cyclin B1          | #4138          | cell signaling |
| E-cadherin         | sc-8426        | Santa Cruz     |
| GAPDH              | NB300-221      | Novusbio       |
| GPx4               | #52455         | cell signaling |
| Keratin 6          | sc-166074      | Santa Cruz     |
| Nrf-2              | #12721         | cell signaling |
| p21                | #2947          | cell signaling |
| p-ERKthr202/tyr204 | #9101          | cell signaling |
| p-IKBaser32/36     | GTX32224       | GeneTex        |
| p-JNKthr183/tyr185 | #4668          | cell signaling |
| SOD1               | #37385         | cell signaling |
| Vimentin           | sc-6260        | Santa Cruz     |

**Supplemental Table S2.** Primer sequences for RT-qPCR.

| Gene                           | Sense (5' –3')           | Antisense (5' –3')       |
|--------------------------------|--------------------------|--------------------------|
| <i>TNF-<math>\alpha</math></i> | CTCTTCTGCCTGCTGCACTTTG   | ATGGGCTACAGGCTTGTCACTC   |
| <i>IL-6</i>                    | ACTCACCTCTTCAGAACGAATTG  | CCATCTTTGGAAGGTTTCAGGTTG |
| <i>GAPDH</i>                   | TGGTATCGTGGAAGGACTCATGAC | ATGCCAGTGAGCTTCCCGTTCAGC |
